# Supplementary material for: High Expression of COA6 Is Related to Unfavorable Prognosis and Enhanced Oxidative Phosphorylation in Lung Adenocarcinoma
Source: MDPI journal article supplement (doi:10.3390/ijms24065705), 2023-03-16
Supplement: s1 [file s1]

**Table S1.** Immunohistochemical staining of COA6 protein in LUAD tissues and Lung normal tissues (HPA)

| Patient id | Gender | Age | Tissue type    | Cell type      | Staining | Intensity | Quantity | Location               |
|------------|--------|-----|----------------|----------------|----------|-----------|----------|------------------------|
| 1687       | Male   | 65  | Adenocarcinoma | Tumor cells    | Medium   | Moderate  | >75%     | Cytoplasmic/membranous |
| 1847       | Male   | 64  | Adenocarcinoma | Tumor cells    | Low      | Moderate  | <25%     | Cytoplasmic/membranous |
| 3003       | Male   | 49  | Adenocarcinoma | Tumor cells    | Medium   | Moderate  | 25%-75%  | Cytoplasmic/membranous |
| 3048       | Female | 67  | Adenocarcinoma | Tumor cells    | Medium   | Moderate  | >75%     | Cytoplasmic/membranous |
| 3052       | Female | 51  | Adenocarcinoma | Tumor cells    | High     | Strong    | >75%     | Cytoplasmic/membranous |
| 2101       | Male   | 21  | Normal tissue  | Alveolar cells | Medium   | Moderate  | 25%-75%  | Cytoplasmic/membranous |
|            |        |     |                | Macrophages    | Medium   | Moderate  | >75%     | Cytoplasmic/membranous |
| 2268       | Female | 49  | Normal tissue  | Alveolar cells | Medium   | Moderate  | 25%-75%  | Cytoplasmic/membranous |
|            |        |     |                | Macrophages    | Medium   | Moderate  | >75%     | Cytoplasmic/membranous |
