# Supplementary material for: High Expression of COA6 Is Related to Unfavorable Prognosis and Enhanced Oxidative Phosphorylation in Lung Adenocarcinoma
Source: MDPI journal article supplement (doi:10.3390/ijms24065705), 2023-03-16
Supplement: s1 [file s1]

**Table S2.** COA6 mRNA expression in LUAD based on patients' clinical data

| Clinical parameters | Cases (n) | COA6 expression | P-value |
|---------------------|-----------|-----------------|---------|
| Age (year)          |           |                 |         |
| <65                 | 216       | 5.823±0.771     | 0.487   |
| ≥65                 | 269       | 5.777±0.696     |         |
| Gender              |           |                 |         |
| Female              | 262       | 5.742±0.729     | 0.067   |
| Male                | 223       | 5.863±0.728     |         |
| Tumor stage         |           |                 |         |
| I                   | 263       | 5.687±0.681     | 0.001   |
| II                  | 116       | 5.859±0.821     |         |
| III                 | 80        | 5.963±0.637     |         |
| IV                  | 26        | 6.130±0.856     |         |
| I vs II             |           |                 | 0.033   |
| I vs III            |           |                 | 0.003   |
| I vs IV             |           |                 | 0.003   |
| II vs III           |           |                 | 0.318   |
| II vs IV            |           |                 | 0.083   |
| III vs IV           |           |                 | 0.305   |
| T stage             |           |                 |         |
| 1                   | 166       | 5.661±0.713     | 0.007   |
| 2                   | 254       | 5.828±0.685     |         |
| 3                   | 44        | 6.014±0.973     |         |
| 4                   | 17        | 6.040±0.563     |         |
| 1 vs 2              |           |                 | 0.021   |
| 1 vs 3              |           |                 | 0.004   |

|         |     |             |        |
|---------|-----|-------------|--------|
| 1 vs 4  |     |             | 0.040  |
| 2 vs 3  |     |             | 0.115  |
| 2 vs 4  |     |             | 0.243  |
| 3 vs 4  |     |             | 0.901  |
| N stage |     |             |        |
| 0       | 313 | 5.720±0.693 | <0.001 |
| 1/2/3   | 161 | 5.971±0.771 |        |
| M stage |     |             |        |
| 0       | 319 | 5.843±0.735 | 0.034  |
| 1       | 25  | 6.172±0.846 |        |

---
